# Supplementary material for: Assessment of Hypertensive Patients’ Complex Metabolic Status Using Data Mining Methods
Source: MDPI journal article supplement (doi:10.3390/jcdd10080345), 2023-08-13
Supplement: s1 [file s1]

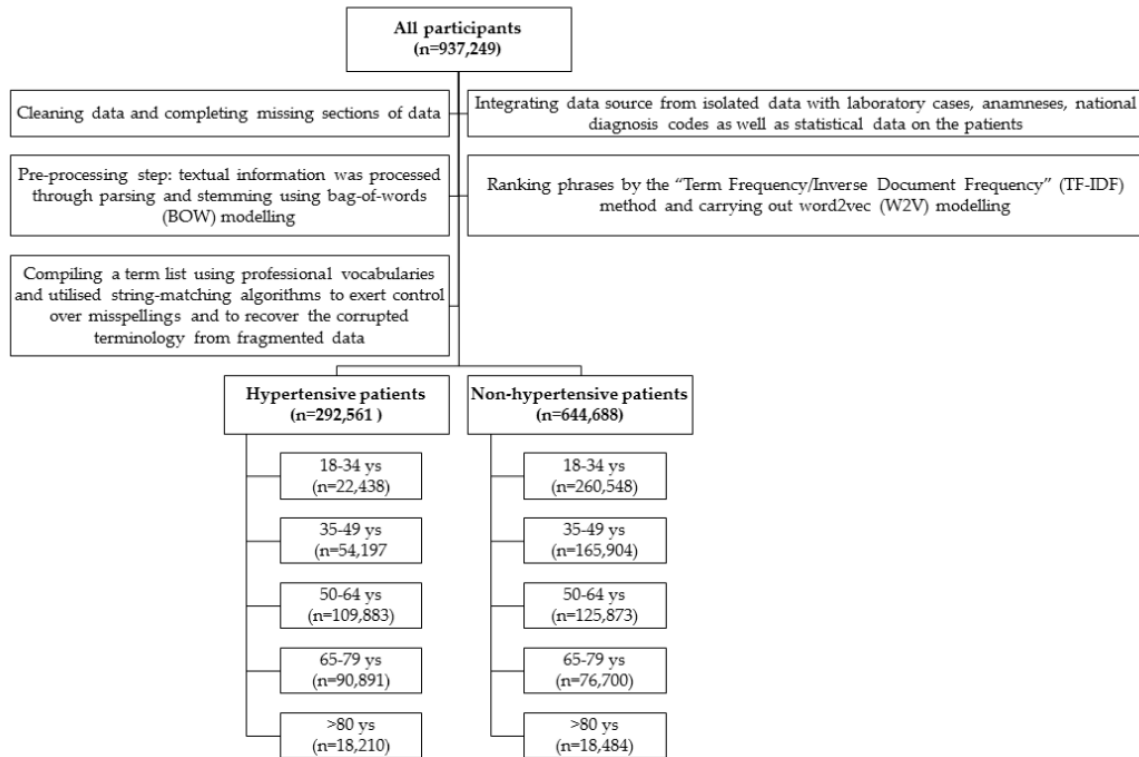

Figure S1: Flowchart of the participants included in our study. (n: number of participant)

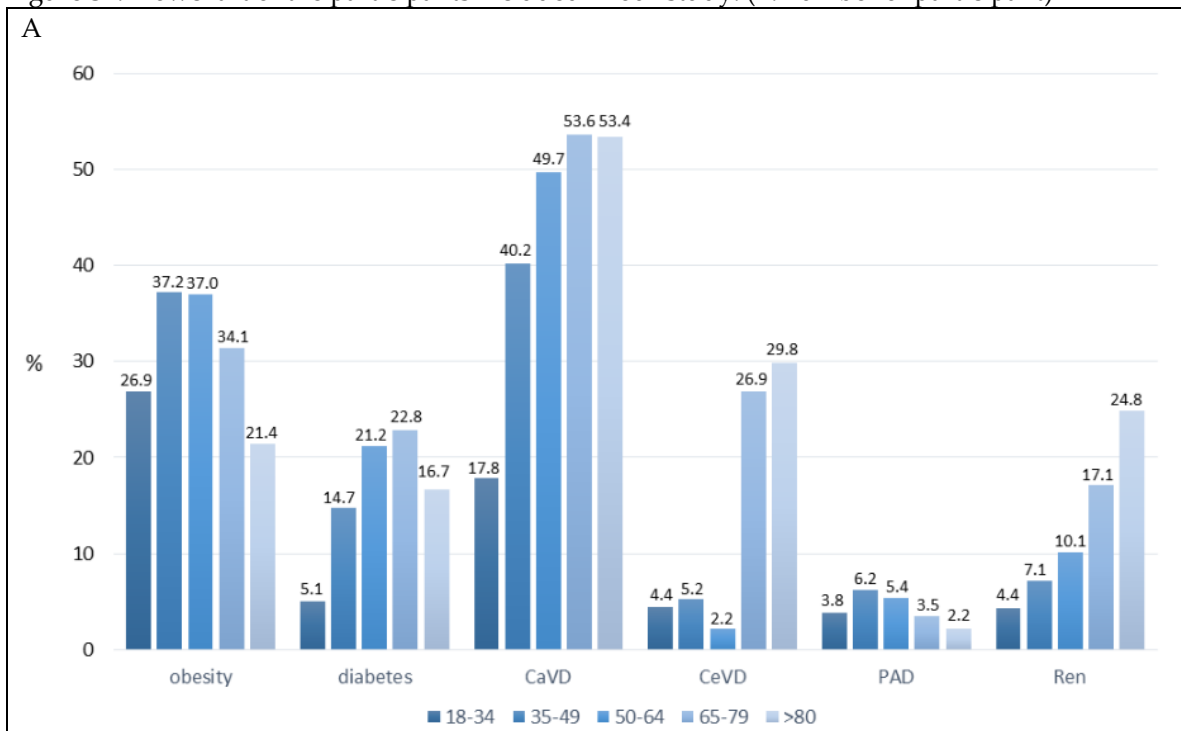

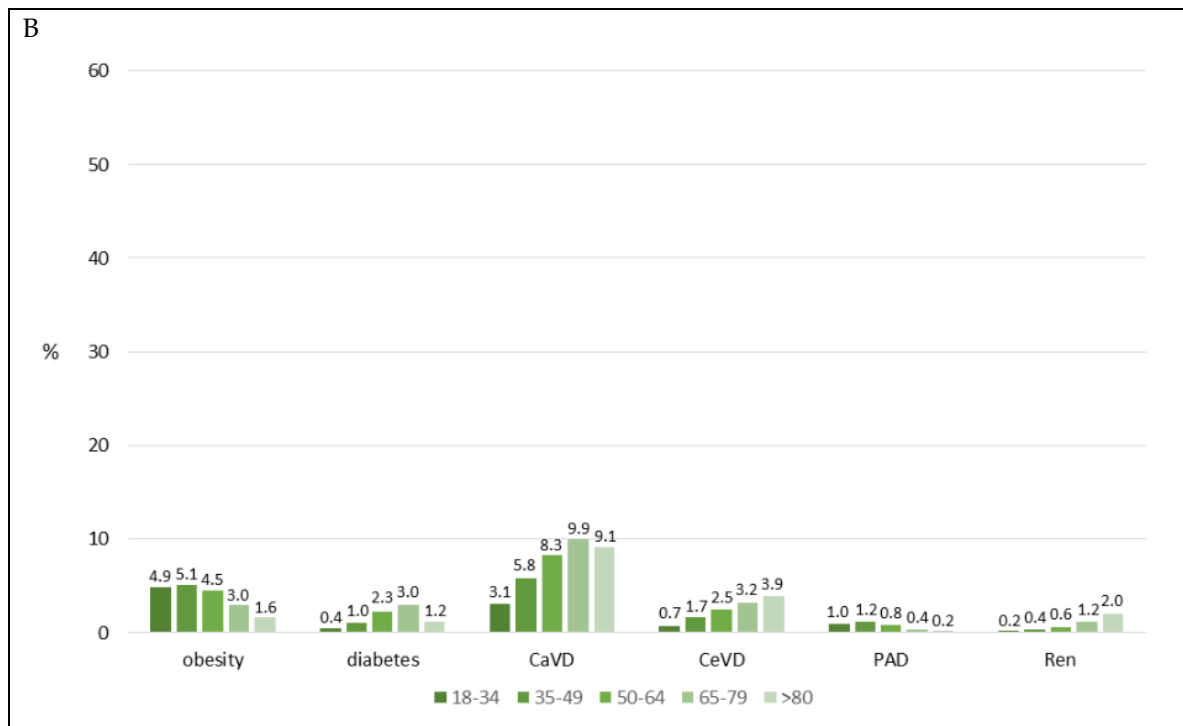

Figure S2: Prevalence (%) of concomitant diseases in the (A) hypertensive and in the (B) non-hypertensive patient populations in different age groups. CaVD: cardiovascular disease; CeVD: cerebrovascular disease, PAD: peripheral arterial disease, Ren: renal disease.
